# Supplementary material for: Thermal plasma gasification of organic waste stream coupled with CO2-sorption enhanced reforming employing different sorbents for enhanced hydrogen production
Source: Royal Society of Chemistry journal article supplement (doi:10.1039/d1ra07719h), 2022-01-01
Supplement: d1ra07719h1.pdf [file d1ra07719h1.pdf]

## Thermal plasma gasification of organic waste stream coupled with CO<sub>2</sub>-sorption enhanced reforming employing different sorbents for enhanced hydrogen production

Vineet Singh Sikarwar <sup>a,b,c\*</sup>, Nageswara Rao Peela <sup>d</sup>, Arun Krishna Vuppaladadiyam <sup>e,f,g</sup>, Newton Libanio Ferreira <sup>h</sup>, Alan Maslani <sup>a</sup>, Ritik Tomar <sup>b,i</sup>, Michael Pohořelý <sup>b</sup>, Erik Meers <sup>c</sup>, Michal Jeremiáš <sup>a</sup>

<sup>a</sup> Institute of Plasma Physics of the Czech Academy of Sciences, v. v. i., Za Slovankou 1782/3, 182 00 Prague 8, Czech Republic.

<sup>b</sup> Department of Power Engineering, University of Chemistry and Technology, Technická 5, 166 28 Prague 6, Czech Republic.

<sup>c</sup> Department of Green Chemistry and Technology, Ghent University, 9000 Ghent, Belgium.

<sup>d</sup> Department of Chemical Engineering, Indian Institute of Technology, Guwahati, Assam -781039, India.

<sup>e</sup> Department of Civil & Environmental Engineering, Hong Kong Polytechnic University, 11 Yuk Choi Rd, Hung Hom, Hong Kong.

<sup>f</sup> College of Science & Engineering, James Cook University, Townsville, Queensland, 4811, Australia.

<sup>g</sup> Catalytic Reaction Engineering Lab, Department of Chemical Engineering, Indian Institute of Technology Delhi, Hauz Khas, New Delhi, India.

<sup>h</sup> University Center of FEI, São Bernardo do Campo, SP, 09850-901, Brazil

<sup>i</sup> ORLEN Unipetrol Centre for Research and Education (ORLEN UniCRE), Areál Chempark, Litvínov-Záluží 43670, Czech Republic.

Corresponding Author's Email Address: sikarwar@ipp.cas.cz; Phone# +420 703666310 (V.S. Sikarwar)

### Supplementary Information

#### Index:

**Table S1.** Components of Aspen Plus flowsheet

**Table S2.** Empirical correlations to calculate H<sub>2</sub>, CO, CO<sub>2</sub> and CH<sub>4</sub> yields during pyrolysis

**Table S3.** Hydrogen yield, dry gas yield and LHV of fuel gas employing CaO, MgO and Li<sub>4</sub>SiO<sub>4</sub> with variable gasification temperature.

**Table S4.** Hydrogen yield, dry gas yield and LHV of fuel gas employing CaO, MgO and Li<sub>4</sub>SiO<sub>4</sub> with variable reforming temperature.

**Table S5.** Hydrogen yield, dry gas yield and LHV of fuel gas employing CaO, MgO and Li<sub>4</sub>SiO<sub>4</sub> with variable steam-to-feedstock ratio.

**Table S6.** Hydrogen yield, dry gas yield and LHV of fuel gas employing CaO, MgO and Li<sub>4</sub>SiO<sub>4</sub> with variable sorbent-to-feedstock ratio.

**Fig. S1.** Variation in syngas constituents after gasification (Stage-I) with variable gasification temperature (800 to 1400 °C)

**Table S1.** Components of Aspen Plus flowsheet.

| <b>Block / stream employed</b> | <b>Type</b> | <b>Objective</b>                                                                                                                                         | <b>Basic condition (blocks)</b> |
|--------------------------------|-------------|----------------------------------------------------------------------------------------------------------------------------------------------------------|---------------------------------|
| Feedstock                      | Stream      | RDF feed                                                                                                                                                 | -                               |
| Argon                          | Stream      | Feed to plasma torch                                                                                                                                     | -                               |
| Water                          | Stream      | Feed to plasma torch                                                                                                                                     | -                               |
| Plasma                         | Stream      | Thermal plasma feed to gasifier                                                                                                                          | -                               |
| Feed to pyrolyzer              | Stream      | Feed from heater to pyrolyzer                                                                                                                            | -                               |
| Water                          | Stream      | Feed to gasifier (Stage-I)                                                                                                                               | -                               |
| Feed to gasifier               | Stream      | Products of pyrolyzer and feed to gasifier                                                                                                               | -                               |
| Gaseous products of gasifier   | Stream      | Gaseous products from gasifier and feed to reformer (Stage-II)                                                                                           | -                               |
| Solid carbon and ash           | Stream      | Output from gasifier                                                                                                                                     | -                               |
| Sorbent                        | Stream      | Sorbent feed to reformer                                                                                                                                 | -                               |
| Final products                 | Stream      | Product gases (primarily H <sub>2</sub> , CO, CO <sub>2</sub> and CH <sub>4</sub> ), solids and ash from reformer to Filter                              | -                               |
| Syngas                         | Stream      | Gaseous species in final products                                                                                                                        | -                               |
| Solids / ash                   | Stream      | Solid species in final products                                                                                                                          | -                               |
| HEATER                         | Block       | Preheat the feed to pyrolyzer                                                                                                                            | T = 800 to 1400 °C; P = 1 bar   |
| PLASMA TORCH                   | Block       | Heater serving as DC water/Ar hybrid plasma torch                                                                                                        | T = 800 to 1400 °C; P = 1 bar   |
| PYROLYZER                      | Block       | RYield reactor for pyrolysis (breaks down the feed into respective components)                                                                           | T = 800 to 1400 °C; P = 1 bar   |
| Calculator                     | Block       | Calculator block calculates the respective yields of syngas constituents based on the temperature dependent empirical equations as mentioned in Table S2 | -                               |

|          |       |                                                                                                                                      |                                                                                                                    |
|----------|-------|--------------------------------------------------------------------------------------------------------------------------------------|--------------------------------------------------------------------------------------------------------------------|
| GASIFIER | Block | RGibbs reactor for gasification (based on the principle of Gibbs free energy minimization)                                           | T = 800 to 1400 °C; P = 1 bar                                                                                      |
| FILTER   | Block | SSplit to separate gaseous and solid products coming from gasifier                                                                   | -                                                                                                                  |
| REFORMER | Block | RGibbs reactor for CO <sub>2</sub> -sorption enhanced reforming reactions (based on the principle of Gibbs free energy minimization) | T = 500 to 800 °C (CaO); T = 200 to 500 °C (MgO); T = 400 to 700 °C (Li <sub>4</sub> SiO <sub>4</sub> ); P = 1 bar |
| FILTER   | Block | SSplit to separate product gases and solids coming from reformer                                                                     | -                                                                                                                  |

**Table S2.** Empirical correlations to calculate H<sub>2</sub>, CO, CO<sub>2</sub> and CH<sub>4</sub> yields during pyrolysis.

| Gas (vol %)     | Empirical equation                              |
|-----------------|-------------------------------------------------|
| Hydrogen        | $0.04694T_p - 16.96286$                         |
| Carbon monoxide | $0.0371T_p + 19.961$                            |
| Carbon dioxide  | $0.000143(T_p)^2 - 0.27808T_p + 139.948$        |
| Methane         | $-9 \times 10^{-5}(T_p)^2 + 0.1221T_p - 25.206$ |

\* T<sub>p</sub> = Pyrolysis temperature in degree Celsius

**Table S3.** Hydrogen yield, dry gas yield and LHV of fuel gas employing CaO, MgO and Li<sub>4</sub>SiO<sub>4</sub> with variable gasification temperature.

| Variable/Sorbent                     | CaO  | MgO    | Li <sub>4</sub> SiO <sub>4</sub> |
|--------------------------------------|------|--------|----------------------------------|
| H <sub>2</sub> Yield (kg/kg of fuel) | 0.14 | 0.0057 | 0.059                            |
| Dry gas Yield (kg/kg of fuel)        | 0.54 | 0.53   | 0.68                             |
| LHV (MJ/Nm <sup>3</sup> )            | 13   | 18     | 14                               |

**Table S4.** Hydrogen yield, dry gas yield and LHV of fuel gas employing CaO, MgO and Li<sub>4</sub>SiO<sub>4</sub> with variable reforming temperature.

| Variable/Sorbent                     | CaO   |       |       |       |       |       |       | MgO    |        |        |       |       |       |       | Li <sub>4</sub> SiO <sub>4</sub> |       |       |       |       |       |       |
|--------------------------------------|-------|-------|-------|-------|-------|-------|-------|--------|--------|--------|-------|-------|-------|-------|----------------------------------|-------|-------|-------|-------|-------|-------|
| Temperature (°C)                     | 500   | 550   | 600   | 650   | 700   | 750   | 800   | 200    | 250    | 300    | 350   | 400   | 450   | 500   | 400                              | 450   | 500   | 550   | 600   | 650   | 700   |
| H <sub>2</sub> Yield (kg/kg of fuel) | 0.139 | 0.139 | 0.142 | 0.146 | 0.153 | 0.150 | 0.151 | 0.0047 | 0.0067 | 0.0090 | 0.013 | 0.023 | 0.037 | 0.057 | 0.043                            | 0.053 | 0.066 | 0.079 | 0.104 | 0.129 | 0.145 |
| Dry gas Yield (kg/kg of fuel)        | 0.28  | 0.28  | 0.32  | 0.45  | 0.92  | 1.4   | 1.4   | 0.42   | 0.42   | 0.48   | 0.91  | 0.97  | 1.02  | 1.08  | 0.40                             | 0.45  | 0.58  | 1.17  | 1.29  | 1.34  | 1.36  |
| LHV (MJ/Nm <sup>3</sup> )            | 12    | 12    | 12    | 11    | 9.8   | 8.8   | 8.7   | 13     | 13     | 12     | 11    | 10    | 10    | 9.6   | 13                               | 12    | 11    | 9.3   | 9.4   | 9.1   | 8.8   |

**Table S5.** Hydrogen yield, dry gas yield and LHV of fuel gas employing CaO, MgO and Li<sub>4</sub>SiO<sub>4</sub> with variable steam-to-feedstock ratio.

| Variable/Sorbent                     | CaO  |      |      |      |      |      |      |        | MgO    |        |        |        |        |        |       |       | Li <sub>4</sub> SiO <sub>4</sub> |       |       |       |       |  |  |  |
|--------------------------------------|------|------|------|------|------|------|------|--------|--------|--------|--------|--------|--------|--------|-------|-------|----------------------------------|-------|-------|-------|-------|--|--|--|
| S/F                                  | 0.8  | 1.0  | 1.2  | 1.4  | 1.6  | 1.8  | 2.0  | 0.8    | 1.0    | 1.2    | 1.4    | 1.6    | 1.8    | 2.0    | 0.8   | 1.0   | 1.2                              | 1.4   | 1.6   | 1.8   | 2.0   |  |  |  |
| H <sub>2</sub> Yield (kg/kg of fuel) | 0.12 | 0.14 | 0.15 | 0.17 | 0.19 | 0.21 | 0.22 | 0.0043 | 0.0057 | 0.0069 | 0.0081 | 0.0092 | 0.0103 | 0.0127 | 0.053 | 0.059 | 0.065                            | 0.074 | 0.084 | 0.093 | 0.101 |  |  |  |
| Dry gas Yield (kg/kg of fuel)        | 0.48 | 0.54 | 0.61 | 0.57 | 0.61 | 0.66 | 0.70 | 0.53   | 0.53   | 0.53   | 0.53   | 0.53   | 0.53   | 0.53   | 0.57  | 0.68  | 0.83                             | 0.93  | 0.97  | 1.0   | 1.1   |  |  |  |
| LHV (MJ/Nm <sup>3</sup> )            | 13   | 13   | 13   | 12   | 10   | 9.5  | 9.0  | 22     | 18     | 16     | 14     | 12     | 11     | 9.8    | 15    | 14    | 13                               | 12    | 10    | 9.5   | 8.7   |  |  |  |

**Table S6.** Hydrogen yield, dry gas yield and LHV of fuel gas employing CaO, MgO and Li<sub>4</sub>SiO<sub>4</sub> with variable sorbent-to-feedstock ratio.

| Variable/Sorbent                     | CaO  |      |      |      |      |      |      | MgO    |        |        |        |        |        |        | Li <sub>4</sub> SiO <sub>4</sub> |       |       |       |       |       |       |
|--------------------------------------|------|------|------|------|------|------|------|--------|--------|--------|--------|--------|--------|--------|----------------------------------|-------|-------|-------|-------|-------|-------|
| SOR/F                                | 0.0  | 0.5  | 1.0  | 1.5  | 2.0  | 2.5  | 3.0  | 0.0    | 0.5    | 1.0    | 1.5    | 2.0    | 2.5    | 3.0    | 0.0                              | 0.5   | 1.0   | 1.5   | 2.0   | 2.5   | 3.0   |
| H <sub>2</sub> Yield (kg/kg of fuel) | 0.12 | 0.13 | 0.13 | 0.14 | 0.14 | 0.14 | 0.14 | 0.0027 | 0.0029 | 0.0057 | 0.0057 | 0.0057 | 0.0057 | 0.0057 | 0.057                            | 0.057 | 0.058 | 0.059 | 0.059 | 0.060 | 0.060 |
| Dry gas Yield (kg/kg of fuel)        | 1.5  | 1.1  | 0.80 | 0.54 | 0.54 | 0.54 | 0.54 | 0.78   | 0.65   | 0.53   | 0.53   | 0.53   | 0.53   | 0.53   | 1.1                              | 0.97  | 0.86  | 0.76  | 0.68  | 0.65  | 0.65  |
| LHV (MJ/Nm <sup>3</sup> )            | 9.8  | 11   | 12   | 13   | 13   | 13   | 13   | 10     | 15     | 18     | 18     | 18     | 18     | 18     | 9.6                              | 10    | 11    | 13    | 14    | 15    | 15    |

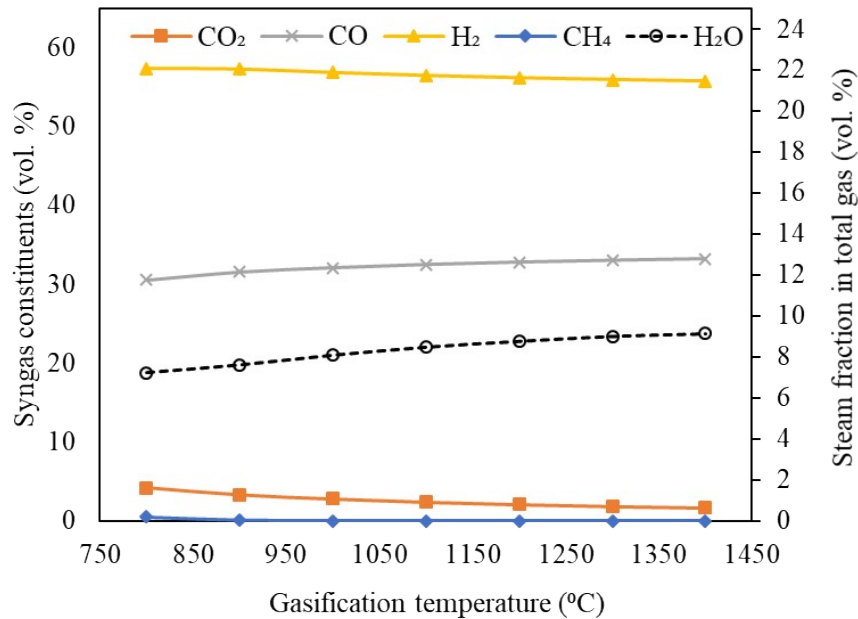

**Fig. S1.** Variation in syngas constituents after gasification (Stage-I) with variable gasification temperature (800 to 1400 °C)
